# Supplementary material for: Perception of radiation dose and potential risks of computed tomography in emergency department medical personnel
Source: PubMed Central journal article supplement — Clin Exp Emerg Med. 2015 Jun 30;2(2):123–9. doi: 10.15441/ceem.14.019 (PMC5052866; doi:10.15441/ceem.14.019), 2015-06-30
Supplement: ceem-14-019-appendix.pdf [file ceem-14-019-appendix.pdf]

**Appendix 1. Questionnaire**

1. Your gender and age?

Gender:  male /  female

Age: (      ) years

2. What's your specialty? \_\_\_\_\_

3. How do you think computed tomography (CT) scans or radiography affect health?

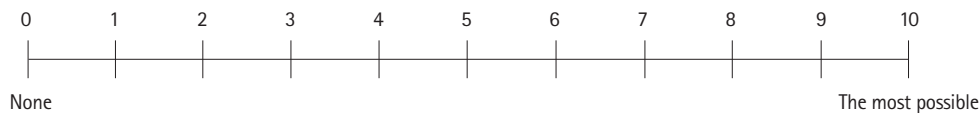

4. Dose estimates for one abdominal CT scan vs. one chest radiograph (CR)?

1 CR                       10 CR                       100 CR                       1,000 CR                       10,000 CR

5. Do you believe the lifetime risk of cancer to be increased by radiation exposure due to medical purpose?

Yes                       No                       Unknown

6. The current estimate of the excess lifetime brain cancer risk of a 1-year-old undergoing brain CT scan is approximately

7 in 100                       7 in 1,000                       7 in 10,000                       7 in 100,000                       7 in 1,000,000

7. The current estimate of the excess lifetime brain cancer risk of a 40-year-old undergoing brain CT scan is approximately

5 in 100                       5 in 1,000                       5 in 10,000                       5 in 100,000                       5 in 1,000,000

8. The current estimate of the excess lifetime cancer risk of a 1-year-old undergoing abdominal CT scan is approximately

14 in 100                       14 in 1,000                       14 in 10,000                       14 in 100,000                       14 in 1,000,000

9. The current estimate of the excess lifetime cancer risk of a 40-year-old undergoing abdominal CT scan is approximately

2 in 100                       2 in 1,000                       2 in 10,000                       2 in 100,000                       2 in 1,000,000

10. Have you known previously about the risks of radiation exposure due to medical purpose?

Yes                       No

11. How did you know about it?

Listened to people around me                       Mass media  
 In hospital                       Internet  
 Others: \_\_\_\_\_
